# Supplementary material for: The De-Icing Comparison Experiment (D-ICE): A study of broadband radiometric measurements under icing conditions in the Arctic
Source: Copernicus journal article supplement (doi:10.5194/amt-2020-397), 2020-10-20
Supplement: Supplementary file 1 [file amt-2020-397-supplement.zip]

**Contacts**

Research Coordinator: Taneil Uttal  
taneil.uttal@noaa.gov

Research Coordinator: Allison McComiskey

Research Coordinator: Chuck Long

**Datagrams:**

**Barrow**

**De-Icing Comparison Experiment**

**Supplementary Document S1**

**Contacts**

Project Lead: Christopher Cox  
christopher.j.cox@noaa.gov

Project Lead: Sara Morris  
sara.morris@noaa.gov

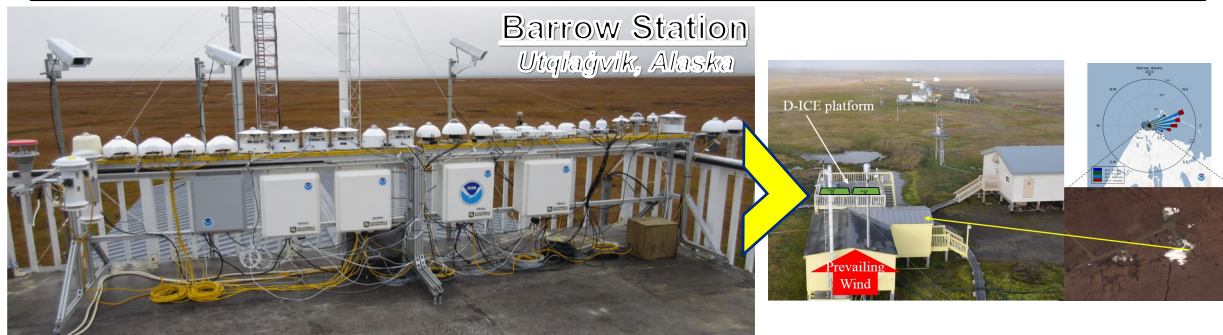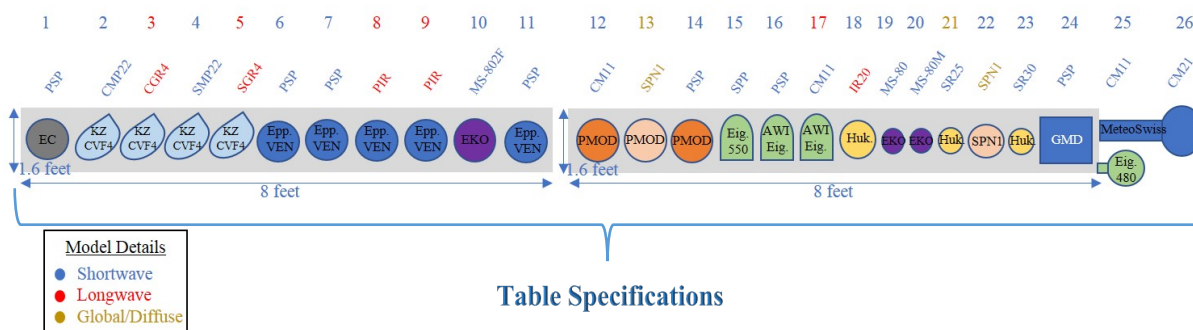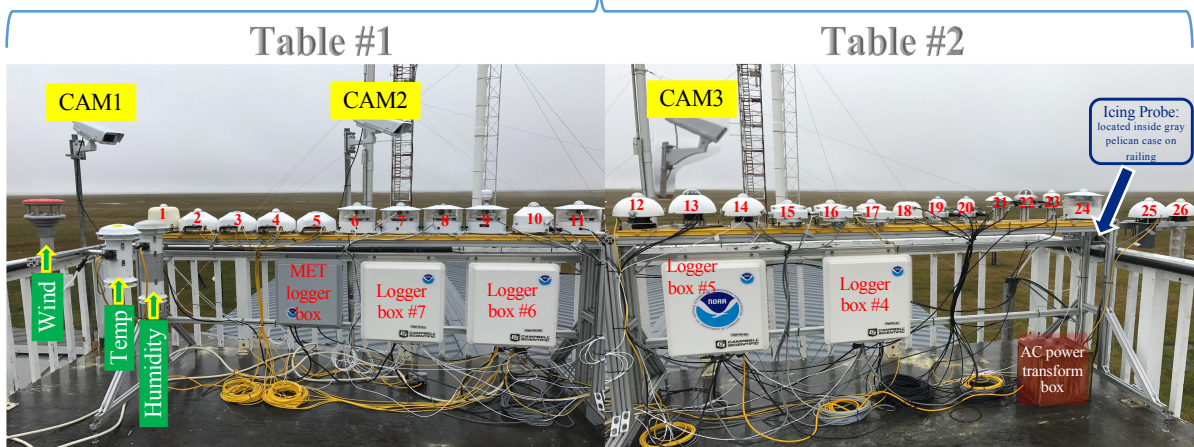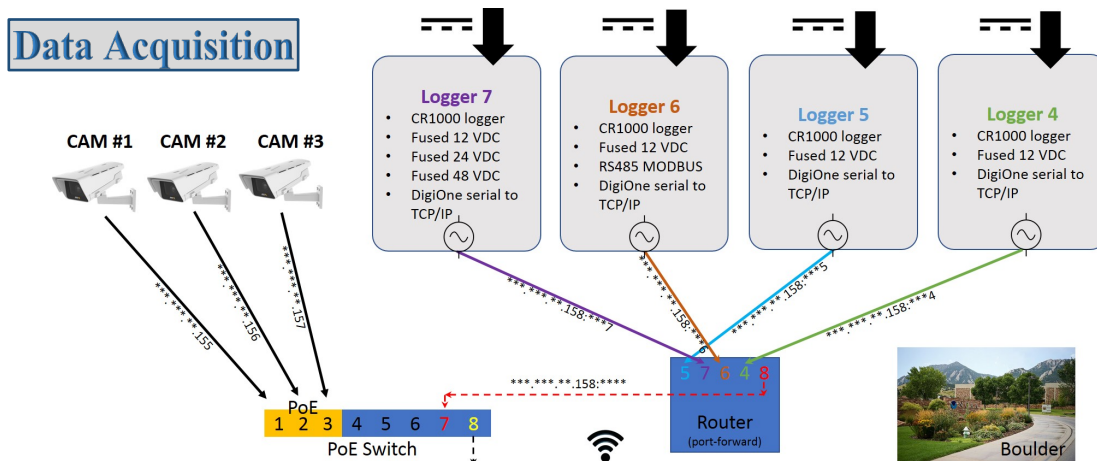

## Instrument Details

|                                                                                   |                                                            |                                                  |                                                             |                                                        |          |                                                        |                         |                               |            |
|-----------------------------------------------------------------------------------|------------------------------------------------------------|--------------------------------------------------|-------------------------------------------------------------|--------------------------------------------------------|----------|--------------------------------------------------------|-------------------------|-------------------------------|------------|
| <br>SW Radiometer:<br>CM11/CM21/<br>CMP22/SMP22<br><br>Direct Radiometer:<br>CHP1 | <br>LW Radiometer:<br>CGR4/SGR4<br><br>Ventilator:<br>CVP4 | <br>PIR<br><br>PSP/SPP<br><br>Ventilator:<br>VEN | <br>SR30<br><br>IR20<br><br>SR25<br><br>Ventilator:<br>VU01 | <br>MS80/MS80M<br><br>MS802<br><br>Ventilator:<br>MV01 | <br>SPN1 | <br>Ventilator:<br>SBL480<br><br>Ventilator:<br>SBL550 | <br>Ventilator:<br>PMOD | <br>Ventilator:<br>MeteoSwiss |            |
| Kipp & Zonen                                                                      |                                                            | Eppley                                           |                                                             | Hukseflux                                              | EKO      | Delta-T                                                | Eigenbrodt              | PMOD                          | MeteoSwiss |

| Table | Table Position   | Radiometer Logger Box # | Radiometer Serial # | Ventilator Logger Box # | Ventilator Model or Serial # | Radiometer Measurement | Radiometer Manufacturer | Radiometer Model | Radiometer Calibrations for D-ICE [ $\mu\text{V/W/m}^2$ ] | Previous Factory Calibration ( $\mu\text{V/W/m}^2$ ) | Ventilation Manufacturer | Ventilation Quality / Quantity | Ventilation Power (Watts) | Heat Applied (y/n)     | Heat Power (Watts) | Voltage           |
|-------|------------------|-------------------------|---------------------|-------------------------|------------------------------|------------------------|-------------------------|------------------|-----------------------------------------------------------|------------------------------------------------------|--------------------------|--------------------------------|---------------------------|------------------------|--------------------|-------------------|
| 1     | 1                | 7                       | 34231F3             | 6                       | Alert                        | Shortwave              | Eppley                  | PSP              | 8.397                                                     | 8.41                                                 | EC, Alert                | DC / 80 [cfs]                  | 10.3                      | no                     | n/a                | 12                |
| 1     | 2                | 6                       | 160478              | 6                       | 171842                       | Shortwave              | Kipp&Zonen              | CMP22            | 9.697                                                     | 9.74                                                 | Kipp&Zonen               | DC / 4400 [rpm]                | 5                         | yes                    | 5.5                | 12                |
| 1     | 3                | 6                       | 160183              | 6                       | 171840                       | Longwave               | Kipp&Zonen              | CGR4             | $CI = 9.545$<br>$C2 = 0.998$                              | 9.4                                                  | Kipp&Zonen               | DC / 4400 [rpm]                | 5                         | yes                    | 5.5                | 12                |
| 1     | 4                | 6                       | 160002              | 6                       | 171843                       | Shortwave              | Kipp&Zonen              | SMP22            | original cal                                              | 10.07                                                | Kipp&Zonen               | DC / 4400 [rpm]                | 5                         | yes                    | 5.5                | 12                |
| 1     | 5                | 6                       | 160008              | 6                       | 171841                       | Longwave               | Kipp&Zonen              | SGR4             | original cal                                              | 11.03                                                | Kipp&Zonen               | DC / 4400 [rpm]                | 5                         | yes                    | 5.5                | 12                |
| 1     | 6                | 7                       | 26818F3             | 7                       | V6 909-12, washers/dome lift | Shortwave              | Eppley                  | PSP              | 8.449                                                     | 8.57                                                 | Eppley                   | DC / 80 [cfs]                  | 10.3                      | no                     | n/a                | 12                |
| 1     | 7                | 7                       | 18135F3             | 7                       | V6 809                       | Shortwave              | Eppley                  | PSP              | 8.556                                                     | 8.65                                                 | Eppley                   | DC / 80 [cfs]                  | 10.3                      | no                     | n/a                | 12                |
| 1     | 8                | 5                       | 34309F3             | 7                       | V6 808, washers/dome lift    | Longwave               | Eppley, PSD             | PIR              | $CI = 3.39$<br>$K = 3.78$                                 | 3.54                                                 | Eppley                   | DC / 80 [cfs]                  | 10.3                      | no                     | n/a                | 12                |
| 1     | 9                | 5                       | 28507F3             | 7                       | V6 689                       | Longwave               | Eppley                  | PIR              | $CI = 3.68$<br>$K = 3.567$                                | 3.76                                                 | Eppley                   | DC / 80 [cfs]                  | 10.3                      | no                     | n/a                | 12                |
| 1     | 10               | 4                       | F16305R             | 4                       | MS-401FU                     | Shortwave              | EKO                     | MS-802F          | 7.056                                                     | 7.01                                                 | EKO                      | DC / 3000 [rpm]                | ? (~4)                    | no                     | n/a                | 12                |
| 1     | 11, do NOT clean | 7                       | 26214               | 5                       | V6 910                       | Shortwave              | Eppley, NCAR            | PSP              | 8.13                                                      | 8.52                                                 | Eppley, lift shield      | DC / 80 [cfs]                  | 10.3                      | no                     | n/a                | 12                |
| 2     | 12               | 6                       | 130814              | 5                       | PMOD                         | Shortwave              | Kipp&Zonen, GMD         | CM11             | 8.327                                                     | 8.31                                                 | PMOD                     | DC / 4200 [rpm]                | 2.3                       | yes                    | 7.8                | 12                |
| 2     | 13               | 5                       | A1571               |                         | GMD PMOD                     | Total, Diffuse         | Delta-T, GMD            | SPN              | factory set                                               | factory set                                          | GMD, PMOD                | DC / 80 [cfs]                  | 2.3                       | via inst. & ventilator | 25.8               | 12                |
| 2     | 14               | 7                       | 20523F3             | 5                       | PMOD                         | Shortwave              | Eppley                  | PSP              | 9.433                                                     | 9.67                                                 | PMOD                     | DC / 4200 [rpm]                | 2.3                       | yes                    | 7.8                | 12                |
| 2     | 15               | 7                       | 38172F3             | 4                       | 0932153                      | Shortwave              | Eppley                  | SPP              | 7.756                                                     | 8.05                                                 | Eigenbrodt 550           | DC / 2500 [rpm]                | 1.6                       | yes                    | 14                 | 24                |
| 2     | 16               | 7                       | 26236               | 4                       | 0931190                      | Shortwave              | Eppley, NCAR            | PSP              | 8.627                                                     | 9.07                                                 | Eigenbrodt 550           | DC / 2500 [rpm]                | 1.6                       | yes                    | 14                 | 24                |
| 2     | 17               | 6                       | 130819              | 4                       | 0932088                      | Shortwave              | Kipp&Zonen, GMD         | CM11             | 8.681                                                     | 8.7                                                  | Eigenbrodt 550 modified  | DC / 2500 [rpm]                | 14.7                      | no                     | n/a                | 48 VDC            |
| 2     | 18               | 4                       | 4037                | 5                       | VU01                         | Longwave               | Hukseflux               | IR20-T1          | $CI = 10.144$<br>$C2 = 0.995$                             | 10.13                                                | Hukseflux                | DC / 50 [m <sup>3</sup> /hr]   | 7.8                       | via inst. & ventilator | 11.5               | 12                |
| 2     | 19               | 4                       | S16088025           | 5                       | MV0117004                    | Shortwave              | EKO                     | MS-80            | 10.616                                                    | 10.64                                                | EKO                      | DC / 3000 [rpm]                | 1.5                       | yes                    | 7                  | 12                |
| 2     | 20               | 6                       | S16090016           | 5                       | MV0117003                    | Shortwave              | EKO                     | MS-80M           | 10.772                                                    | 10.76                                                | EKO                      | DC / 3000 [rpm]                | 1.5                       | yes                    | 7                  | 12                |
| 2     | 21               | 4                       | 2510                | none                    | none                         | Shortwave              | Hukseflux               | SR25-T1          | 14.804                                                    | 14.87                                                | none                     | n/a                            | n/a                       | via instrument         | 1.5                | 12                |
| 2     | 22               | 4                       | A1338               | none                    | none                         | Total, Diffuse         | Delta-T                 | SPN              | factory set                                               | factory set                                          | none                     | n/a                            | n/a                       | via instrument         | 18                 | 12                |
| 2     | 23               | 6                       | 2060                | none                    | none                         | Shortwave              | Hukseflux               | SR30-D1          | original cal                                              | 10.29                                                | none                     | n/a                            | 0.6                       | via instrument         | 1.7                | 12                |
| 2     | 24, GMD BSRN     | none                    | 8041                | none                    | n/a                          | Shortwave              | Eppley                  | PSP              | n/a                                                       | n/a                                                  | Eppley                   | DC / 80 [cfs]                  | 10.3                      | no                     | n/a                | 12                |
| 2     | 25               | 6                       | 130617              | 4                       | 0932152                      | Shortwave              | Kipp&Zonen, GMD         | CM11             | 8.741                                                     | 8.79                                                 | Eigenbrodt 480           | DC / 3300 [rpm]                | 2.5                       | yes                    | 25                 | 24                |
| 2     | 26               | 5                       | 970426              | 5 = fan<br>4 = heat     | MeteoSwiss                   | Shortwave              | MeteoSwiss              | CM21             | 19.808                                                    | 19.74                                                | MeteoSwiss               | DC / 3450 [rpm]                | ?                         | yes                    | 10                 | 12 VDC/<br>48 VAC |
| n/a   | none             | 5                       | Icing Probe         | None                    | Icing Probe                  | Ice accretion          | Anasphere               | n/a              | n/a                                                       | n/a                                                  | n/a                      | n/a                            | n/a                       | n/a                    | n/a                | n/a               |
| n/a   | none             | 7                       | 26226               | n/a                     | SPARE                        | Shortwave              | Eppley, NCAR            | PSP              | 8.053                                                     | 8.46                                                 | none                     | n/a                            | n/a                       | no                     | n/a                | n/a               |

### Legend

Fan tac collected

Fan tac unavailable

Fan tac suppressed/not logged

No fan

### Power Details





**Contacts**

Research Coordinator: Taneil Uttal  
taneil.uttal@noaa.gov

Research Coordinator: Allison McComiskey  
Allison.mccomiskey@noaa.gov

Research Coordinator: Chuck Long  
chuck.long@noaa.gov

**Datagrams:  
Barrow  
De-Icing Comparison Experiment**

**Contacts**

Project Lead: Christopher Cox  
christopher.j.cox@noaa.gov

Project Lead: Sara Morris  
sara.morris@noaa.gov

## QUICKLOOKS

## PROCESSING

diagnostics

**Processing Conversions:**

**Shortwave Radiation (#1, #3, #4, #5, #6)**

**DESCRIPTION:**

SW = 1000 \* Recorded value / calibration coefficient

**UNITS:**

W/m<sup>2</sup> = 1000 \* mV / μV/W/m<sup>2</sup>

**Longwave Radiation (#2)**

**DESCRIPTION:**

Sigma = 5.6704e-8, Emissivity = 1, DCF = dome correction factor, SF = calibration coefficient

A = 0.0010295  
B = 0.0002391  
C = 0.0000001568

LW\_case = 1/(A+B\*ln(T\_case\*1000)+C\*ln(T\_case\*1000)<sup>3</sup>)  
LW\_dome = 1/(A+B\*ln(T\_dome\*1000)+C\*ln(T\_dome\*1000)<sup>3</sup>)  
LW = SF\*Recorded value+Sigma(E(LW\_case)+DCF((LW\_case)-(LW\_dome)))

**UNITS:**

LW\_case\_mV = 1/(A+B\*ln(mV\*1000)+C\*ln(mV\*1000)<sup>3</sup>)  
LW\_dome\_mV = 1/(A+B\*ln(mV\*1000)+C\*ln(mV\*1000)<sup>3</sup>)  
W/m<sup>2</sup> = (mV/W/m<sup>2</sup>)\*mV+Sigma(E(LW\_case\_mV)+DCF((LW\_case\_mV)-(LW\_dome\_mV)))

**Processing Quality Control Techniques:**

**Historical Quality Control Techniques:**

Long, C. N., & Shi, Y. (2008). *An Automated Quality Assessment and Control Algorithm for Surface Radiation Measurements*. OASJ, 2, 23-37. doi: 10.2174/1874282300802010023

Younkin, K., & Long, C. N. (2004). *Improved Correction of IR Loss in Diffuse Shortwave Measurements: An ARM Value Added Product*.

**\*Arctic Quality Control Techniques: contact information**

Chuck Long (chuck.long@noaa.gov)  
Chris Cox (christopher.j.cox@noaa.gov)

## CAMERA IMAGES

CAM#1

CAM#2

CAM#3

## D-ICE DATA

**Data:**

<ftp://ftp1.esrl.noaa.gov/psd3/arctic/DICE/>

Cox, C.: De-Icing Comparison Experiment (D-ICE) campaign data: Radiometric and icing condition observations from the NOAA Barrow Atmospheric Baseline Observatory, August 2017-July 2018 (NCEI Accession 0209059). NOAA National Centers for Environmental Information. Dataset. <https://accession.ncei.noaa.gov/0209059>, 2020a.

Cox, C.: De-Icing Comparison Experiment (D-ICE) campaign data: Best-estimate downwelling longwave and shortwave radiometric fluxes from the NOAA Barrow Atmospheric Baseline Observatory, August 2017-July 2018 (NCEI Accession 0209058). NOAA National Centers for Environmental Information. Dataset. <https://accession.ncei.noaa.gov/0209058>, 2020b.

DICEXACO images: <https://doi.org/10.5439/1507148>

## FILE INGEST LOCATIONS

| Folder Name | FTP Location                                          |
|-------------|-------------------------------------------------------|
| Raw         | ftp://ftp1.esrl.noaa.gov/psd3/arctic/DICE/raw/        |
| Ingest      | ftp://ftp1.esrl.noaa.gov/psd3/arctic/DICE/ingest/     |
| Products    | ftp://ftp1.esrl.noaa.gov/psd3/arctic/DICE/products/   |
| Quicklooks  | ftp://ftp1.esrl.noaa.gov/psd3/arctic/DICE/quicklooks/ |

## PRODUCT FILES

**WEBPAGE**

<https://www.esrl.noaa.gov/psd/arctic/d-ice/>

Radiometric & icing data: dice\_utqiaqvik\_yyyymmdd.hhmmss.cdf

Best-estimate fluxes: dice\_utqiaqvik\_best\_estimate\_yyyymmdd.hhmmss.cdf
