# Supplementary material for: The De-Icing Comparison Experiment (D-ICE): A study of broadband radiometric measurements under icing conditions in the Arctic
Source: Copernicus journal article supplement (doi:10.5194/amt-2020-397), 2020-10-20
Supplement: Supplementary file 2 [file amt-2020-397-supplement.zip]

| D_ICE Post Calibration: August 2018                       |                     |                                    |                                    |                      |
|-----------------------------------------------------------|---------------------|------------------------------------|------------------------------------|----------------------|
| Calibration Data Collected 2-AUG-2018 Through 26-AUG-2018 |                     |                                    |                                    |                      |
| Serial Number                                             | Factory Calibration | 2017 Calibration                   | 2018 Calibration                   | %Change 2017 to 2018 |
| PSP 34231                                                 | 8.410               | 8.397                              | 8.313                              | -1.000               |
| PSP 18135                                                 | 8.650               | 8.556                              | 8.569                              | 0.152                |
| PSP 26818                                                 | 8.570               | 8.449                              | 8.395                              | -0.639               |
| PSP 20523                                                 | 9.670               | 9.433                              | 9.493                              | 0.636                |
| PSP 26214                                                 | 8.520               | 8.130                              | 8.051                              | -0.972               |
| PSP 26236                                                 | 9.070               | 8.627                              | 8.589                              | -0.440               |
| PSP 26226                                                 | 8.460               | 8.053                              | NA                                 | NA                   |
| SPP 38172                                                 | 8.050               | 7.756                              | 7.691                              | -0.838               |
| MS80 S16090016                                            | 10.760              | 10.772                             | 10.754                             | -0.167               |
| CMP11 130814                                              | 8.310               | 8.327                              | 8.263                              | -0.769               |
| CMP11 130819                                              | 8.700               | 8.681                              | 8.696                              | 0.173                |
| CMP11 130617                                              | 8.790               | 8.741                              | 8.701                              | -0.458               |
| CMP22 160478                                              | 9.740               | 9.697                              | 9.676                              | -0.217               |
| SR25 2510                                                 | 14.870              | 14.804                             | 14.784                             | -0.135               |
| MS80 F16305R                                              | 7.010               | 7.056                              | 6.938                              | -1.672               |
| MS80 S16088025                                            | 10.640              | 10.616                             | 10.570                             | -0.433               |
| CM21 970426                                               | 19.740              | 19.808                             | 19.753                             | -0.278               |
|                                                           |                     |                                    |                                    |                      |
| D_ICE IR Calibrations                                     |                     |                                    |                                    |                      |
| PIR 28507                                                 |                     | C1 = 3.680, C2 = 1.000, C3 = 3.567 | C1 = 3.688, C2 = 1.007, C3 = 3.444 |                      |
| PIR 34309                                                 |                     | C1 = 3.390, C2 = 1.000, C3 = 3.780 | C1 = 3.678, C2 = 1.001, C3 = 3.157 |                      |
| IR20 4037                                                 |                     | C1 = 10.144, C2 = 0.995, C3 = N/A  | C1 = 10.221, C2 = 0.999, C3 = N/A  |                      |
| CGR4 160183                                               |                     | C1 = 9.545, C2 = 0.998, C3 = N/A   | C1 = 9.553, C2 = 1.002, C3 = N/A   |                      |

**S3.** Pre- and post-campaign radiometer calibrations from D-ICE.
