# Supplementary material for: The De-Icing Comparison Experiment (D-ICE): A study of broadband radiometric measurements under icing conditions in the Arctic
Source: Copernicus journal article supplement (doi:10.5194/amt-2020-397), 2020-10-20
Supplement: Supplementary file 3 [file amt-2020-397-supplement.zip]

|                                                                                                                                      | <i>Table Position<br/>(left to right)</i> | <i>1</i>                                                                                                                                                                                                | <i>2</i>                 | <i>3</i>                 | <i>4</i>               | <i>5</i>                 | <i>6</i>                                                                            | <i>7</i>                                                                            | <i>8</i>                                                                            | <i>9</i> | <i>10</i> | <i>11<br/>No Maintenance</i> | <i>12</i>                                                            | <i>13</i>    |     |
|--------------------------------------------------------------------------------------------------------------------------------------|-------------------------------------------|---------------------------------------------------------------------------------------------------------------------------------------------------------------------------------------------------------|--------------------------|--------------------------|------------------------|--------------------------|-------------------------------------------------------------------------------------|-------------------------------------------------------------------------------------|-------------------------------------------------------------------------------------|----------|-----------|------------------------------|----------------------------------------------------------------------|--------------|-----|
| Radio-<br>meter<br>Info                                                                                                              | <i>sn</i>                                 | 34231F3                                                                                                                                                                                                 | 160478                   | 160183                   | 160002                 | 160008                   | 26818F3                                                                             | 18135F3                                                                             | 34309F3                                                                             | 28507F3  | F16305R   | 26214                        | 130814                                                               | A1571        |     |
|                                                                                                                                      | <i>Manufacturer</i>                       | Eppley                                                                                                                                                                                                  | Kipp&Zonen               | Kipp&Zonen               | Kapp&Zonen             | Kipp&Zonen               | Eppley                                                                              | Eppley                                                                              | Eppley, PSD                                                                         | Eppley   | EKO       | Eppley, NCAR                 | Kipp&Zonen, GMD                                                      | Delta-T, GMD |     |
|                                                                                                                                      | <i>Model</i>                              | PSP                                                                                                                                                                                                     | CMP22                    | CGR4                     | SMP22                  | SGR4                     | PSP                                                                                 | PSP                                                                                 | PSP                                                                                 | PIR      | PIR       | MS-802F                      | PSP                                                                  | CM11         | SPN |
| Ventilation<br>Info                                                                                                                  | <i>Manufacturer</i>                       | EC, Alert                                                                                                                                                                                               | Kipp&Zonen               | Kipp&Zonen               | Kipp&Zonen             | Kipp&Zonen               | Eppley                                                                              | Eppley                                                                              | Eppley                                                                              | Eppley   | EKO       | Eppley, lift shield          | PMOD                                                                 | GMD, PMOD    |     |
|                                                                                                                                      | <i>Model or sn</i>                        | ALERT                                                                                                                                                                                                   | 171842                   | 171840                   | 171843                 | 171841                   | V6 909-12,<br>washers/dome lift                                                     | V6 809                                                                              | V6 808, washers/dome<br>lift                                                        | V6 689   | MS-401FU  | V6 910                       | PMOD                                                                 | GMD PMOD     |     |
| <i>Modifications/Experiments conducted over D-ICE annual cycle (BELOW)</i>                                                           |                                           |                                                                                                                                                                                                         |                          |                          |                        |                          |                                                                                     |                                                                                     |                                                                                     |          |           |                              |                                                                      |              |     |
| Modification Dates                                                                                                                   | 4 JAN 2018                                |                                                                                                                                                                                                         |                          |                          |                        |                          |                                                                                     |                                                                                     |                                                                                     |          |           |                              | Fan stopped during site inspection;<br>20:30 UTC: fan was re-started |              |     |
|                                                                                                                                      | 5 JAN 2018                                | (ALL) 19:10 UTC: Unpowered all heaters and fans for icing short-term experiment (exceptions for #23/SR30 and #24/BSRN which served as ventilated controls)<br>23:20 UTC: Repowered all heaters and fans |                          |                          |                        |                          |                                                                                     |                                                                                     |                                                                                     |          |           |                              |                                                                      |              |     |
|                                                                                                                                      | 6 JAN 2018                                |                                                                                                                                                                                                         | *Fan screens remained on | Pulled fan screens off   | Pulled fan screens off | *Fan screens remained on |                                                                                     |                                                                                     |                                                                                     |          |           |                              |                                                                      |              |     |
|                                                                                                                                      | 7 JAN 2018                                |                                                                                                                                                                                                         |                          |                          |                        |                          | 00:11 UTC: Unplugged fan for small subset of instruments for ventilation experiment | 00:11 UTC: Unplugged fan for small subset of instruments for ventilation experiment | 00:11 UTC: Unplugged fan for small subset of instruments for ventilation experiment |          |           |                              |                                                                      |              |     |
|                                                                                                                                      |                                           |                                                                                                                                                                                                         |                          |                          |                        |                          | 00:50 UTC: Repowered fan                                                            | 00:50 UTC: Repowered fan                                                            | 00:50 UTC: Repowered fan                                                            |          |           |                              |                                                                      |              |     |
|                                                                                                                                      | 8 JAN 2018                                |                                                                                                                                                                                                         |                          |                          |                        |                          | 19:45 UTC: Unplugged fan                                                            |                                                                                     | 19:45 UTC: Unplugged fan                                                            |          |           |                              |                                                                      |              |     |
|                                                                                                                                      |                                           |                                                                                                                                                                                                         |                          |                          |                        |                          | 20:24 UTC: Repowered fan                                                            |                                                                                     | 20:24 UTC: Repowered fan                                                            |          |           |                              |                                                                      |              |     |
|                                                                                                                                      |                                           | 21:04 UTC: Unplugged fan                                                                                                                                                                                | 21:04 UTC: Unplugged fan |                          |                        |                          | 21:04 UTC: Unplugged fan                                                            |                                                                                     | 21:04 UTC: Unplugged fan                                                            |          |           | 21:04 UTC: Unplugged fan     |                                                                      |              |     |
|                                                                                                                                      |                                           | 22:09 UTC: Repowered fan                                                                                                                                                                                | 22:09 UTC: Repowered fan |                          |                        |                          | 22:09 UTC: Repowered fan                                                            |                                                                                     | 22:09 UTC: Repowered fan                                                            |          |           | 22:09 UTC: Repowered fan     |                                                                      |              |     |
|                                                                                                                                      | 9 JAN 2018                                | 18:26 UTC: Lights out test; all camera lights turned off                                                                                                                                                |                          |                          |                        |                          |                                                                                     |                                                                                     |                                                                                     |          |           |                              |                                                                      |              |     |
|                                                                                                                                      |                                           | 18:40 UTC: Lights turned back on                                                                                                                                                                        |                          |                          |                        |                          |                                                                                     |                                                                                     |                                                                                     |          |           |                              |                                                                      |              |     |
|                                                                                                                                      |                                           |                                                                                                                                                                                                         | 19:16 UTC: Unplugged fan | 19:16 UTC: Unplugged fan |                        |                          | 19:16 UTC: Unplugged fan                                                            |                                                                                     | 19:16 UTC: Unplugged fan                                                            |          |           |                              | 19:16 UTC: Unplugged fan                                             |              |     |
|                                                                                                                                      |                                           |                                                                                                                                                                                                         | 19:58 UTC: Repowered fan | 19:58 UTC: Repowered fan |                        |                          | 19:54 UTC: Repowered fan                                                            |                                                                                     | 20:03 UTC: Repowered fan                                                            |          |           |                              | 19:58 UTC: Repowered fan                                             |              |     |
|                                                                                                                                      |                                           | 20:41 UTC: Lights out test; all camera lights turned off                                                                                                                                                |                          |                          |                        |                          |                                                                                     |                                                                                     |                                                                                     |          |           |                              |                                                                      |              |     |
|                                                                                                                                      |                                           | 21:10 UTC: Lights turned back on                                                                                                                                                                        |                          |                          |                        |                          |                                                                                     |                                                                                     |                                                                                     |          |           |                              |                                                                      |              |     |
| 21:24 - 21:28 UTC: Spray test; sprayed two mists of room-temperature water on east-side of domes, and two more on west-side of domes |                                           |                                                                                                                                                                                                         |                          |                          |                        |                          |                                                                                     |                                                                                     |                                                                                     |          |           |                              |                                                                      |              |     |

|                                                                                                                                    | <i>Table Position<br/>(left to right)</i> | <i>14</i> | <i>15</i>      | <i>16</i>                | <i>17</i>                                                                           | <i>18</i>                | <i>19</i>                | <i>20</i>                | <i>21</i> | <i>22</i> | <i>23</i> | <i>24<br/>BSRN</i> | <i>25</i>       | <i>26</i>                                     |                                               |
|------------------------------------------------------------------------------------------------------------------------------------|-------------------------------------------|-----------|----------------|--------------------------|-------------------------------------------------------------------------------------|--------------------------|--------------------------|--------------------------|-----------|-----------|-----------|--------------------|-----------------|-----------------------------------------------|-----------------------------------------------|
| Radio-<br>meter<br>Info                                                                                                            | <i>sn</i>                                 | 20523F3   | 38172F3        | 26236                    | 130819                                                                              | 4037                     | S16088025                | S16090016                | 2510      | A1338     | 2060      | 8041               | 130617          | 970426                                        |                                               |
|                                                                                                                                    | <i>Manufacturer</i>                       | Eppley    | Eppley         | Eppley, NCAR             | Kipp&Zonen, GMD                                                                     | Hukseflux                | EKO                      | EKO                      | Hukseflux | Delta-T   | Hukseflux | Eppley             | Kipp&Zonen, GMD | Meteo-Swiss                                   |                                               |
|                                                                                                                                    | <i>Model</i>                              | PSP       | SPP            | PSP                      | CM11                                                                                | IR20-T1                  | MS-80                    | MS-80M                   | SR25-T1   | SPN       | SR30-D1   | PSP                | CM11            | CM21                                          |                                               |
| Ventilating<br>on Info                                                                                                             | <i>Manufacturer</i>                       | PMOD      | Eigenbrodt 550 | Eigenbrodt 550           | Eigenbrodt 550 modified                                                             | Hukseflux                | EKO                      | EKO                      | none      | none      | none      | Eppley             | Eigenbrodt 480  | METEOSWISS                                    |                                               |
|                                                                                                                                    | <i>Model or sn</i>                        | PMOD      | 0932153        | 0931190                  | 0932088                                                                             | VU01                     | MV0117004                | MV0117003                | none      | none      | none      | unknown            | 0932152         | METEOSWISS                                    |                                               |
| <i>Modifications/Experiments conducted over D-ICE annual cycle (BELOW)</i>                                                         |                                           |           |                |                          |                                                                                     |                          |                          |                          |           |           |           |                    |                 |                                               |                                               |
| Modification Dates                                                                                                                 | 4 JAN 2018                                |           |                |                          |                                                                                     |                          |                          |                          |           |           |           |                    |                 |                                               |                                               |
|                                                                                                                                    | 5 JAN 2018                                |           |                |                          |                                                                                     |                          |                          |                          |           |           |           |                    |                 |                                               |                                               |
|                                                                                                                                    | 6 JAN 2018                                |           |                |                          |                                                                                     |                          |                          |                          |           |           |           |                    |                 |                                               |                                               |
|                                                                                                                                    | 7 JAN 2018                                |           |                |                          | 00:11 UTC: Unplugged fan for small subset of instruments for ventilation experiment |                          |                          |                          |           |           |           |                    |                 |                                               |                                               |
|                                                                                                                                    |                                           |           |                |                          | 00:50 UTC: Repowered fan                                                            |                          |                          |                          |           |           |           |                    |                 |                                               |                                               |
|                                                                                                                                    | 8 JAN 2018                                |           |                | 19:45 UTC: Unplugged fan | 19:45 UTC: Unplugged fan                                                            |                          |                          |                          |           |           |           |                    |                 | 20:09 UTC: Unplugged heater (fan remained on) |                                               |
|                                                                                                                                    |                                           |           |                | 20:24 UTC: Repowered fan | 20:24 UTC: Repowered fan                                                            |                          |                          |                          |           |           |           |                    |                 | 20:24 UTC: Repowered heater                   |                                               |
|                                                                                                                                    |                                           |           |                | 21:04 UTC: Unplugged fan | 21:04 UTC: Unplugged fan                                                            |                          | 21:04 UTC: Unplugged fan |                          |           |           |           |                    |                 | 21:04 UTC: Unplugged heater (fan remained on) |                                               |
|                                                                                                                                    |                                           |           |                | 22:09 UTC: Repowered fan | 22:09 UTC: Repowered fan                                                            |                          | 22:09 UTC: Repowered fan |                          |           |           |           |                    |                 | 22:09 UTC: Repowered heater                   |                                               |
|                                                                                                                                    | 9 JAN 2018                                |           |                |                          |                                                                                     |                          |                          |                          |           |           |           |                    |                 |                                               |                                               |
|                                                                                                                                    |                                           |           |                |                          | 19:16 UTC: Unplugged fan                                                            | 19:16 UTC: Unplugged fan |                          | 19:16 UTC: Unplugged fan |           |           |           |                    |                 |                                               | 19:16 UTC: Unplugged heater (fan remained on) |
|                                                                                                                                    |                                           |           |                |                          | 19:54 UTC: Repowered fan                                                            | 19:58 UTC: Repowered fan |                          | 20:06 UTC: Repowered fan |           |           |           |                    |                 |                                               | 20:03 UTC: Repowered heater                   |
|                                                                                                                                    |                                           |           |                |                          |                                                                                     |                          |                          |                          |           |           |           |                    |                 |                                               |                                               |
|                                                                                                                                    |                                           |           |                |                          |                                                                                     |                          |                          |                          |           |           |           |                    |                 |                                               |                                               |
|                                                                                                                                    |                                           |           |                |                          |                                                                                     |                          |                          |                          |           |           |           |                    |                 |                                               |                                               |
|                                                                                                                                    |                                           |           |                |                          |                                                                                     |                          |                          |                          |           |           |           |                    |                 |                                               |                                               |
| 21:24-21:27 UTC: Spray test; sprayed two mists of room-temperature water on east-side of domes, and two more on west-side of domes |                                           |           |                |                          |                                                                                     |                          |                          |                          |           |           |           |                    |                 |                                               |                                               |

## S2. Record of modifications made to D-ICE systems during the course of the campaign.
